# Supplementary material
Source: Springer Nature journal article supplement (https://www.springermedizin.de/resource/supplementary/12943_2009_566_MOESM8_ESM.pdf/9554984)

(a) **EMILIN2 F**  
 -407 →  
 GAATGAGTCATTGCAAATGCTGTAA**CG**TAGACCCTTATCCCAAACCCTTT**CG**CCCCTCCACCC**CG**AGCCCCCTG**CG**AGAAG**CG**AAGGGAC  
 TGGAGAG**CG**GGGAGACTTGGTGGGGGGAGAGTCA**CG**TTT**CG**GAGAGGGGAAGTCAAATAAAGAGGG**CG**GCACC**CG**GGGGGACCTGTG**CG**TCAT  
 TGAGGGAC**CG**GGGAGAAG**CG**CAGGG**CG**CA**CG**GGGCTGCAGAAGGAGAAGTAGGAA**CG**AGAAGC**CG**GAGGGGG**CG**GC**CG**CGGAGGACTGTT  
 GGAG**CG**CC**CG**CGAAG**CG**CC**CG**AGCCTCTTGCCTT**CG**CGGG**CG**CGCCCTGGCC**CG**CGGCAGCCTTGTGGC**CG**GTGCC**CG**AT**CG**CG**CG**CT  
 C**CG**GACC**CG**GGCAGG**CG**GGG**CG**CGCC**CG**CTG**CG**CGCGGGATGTGGCAGCCAGAC**CG**GCCCTGGCCCC**CG**CGTGCCCTGG**CG**CTGGG**CG**CTGG  
**CG**CTGCTGGCCCTGGTTGG**CG**CGGGGCTGTGCCA**CG**CC**CG**GGCC**CG**CAGCC**CG**GGGTATCC  
 ←  
 +110  
**EMILIN2 RN**

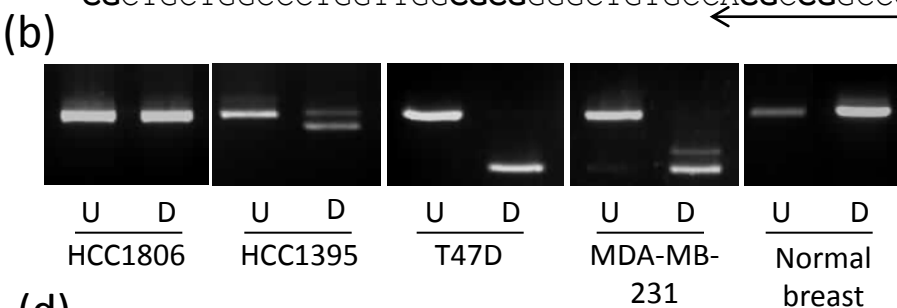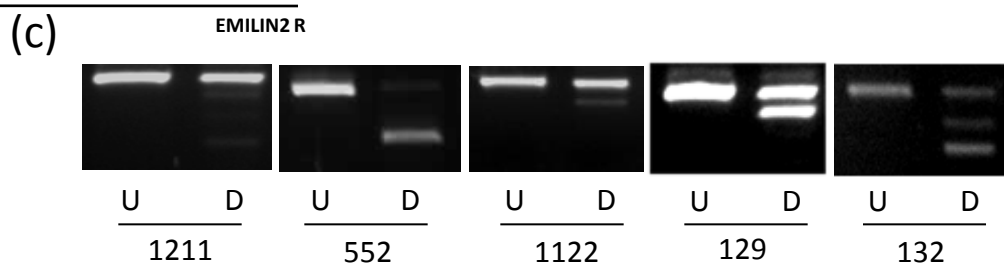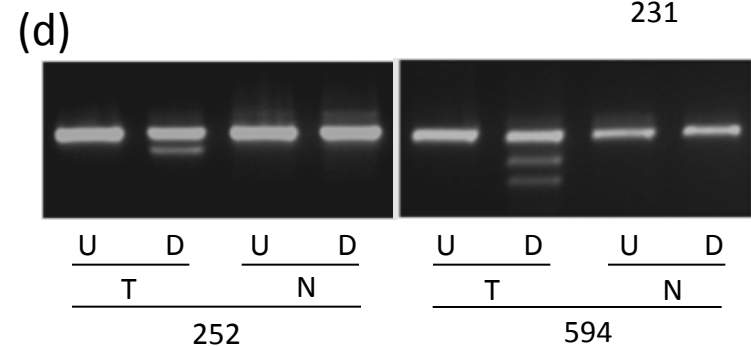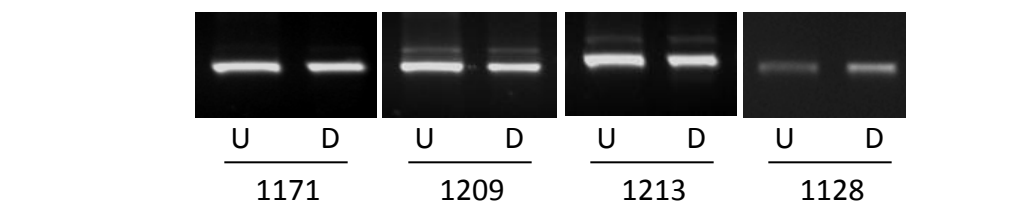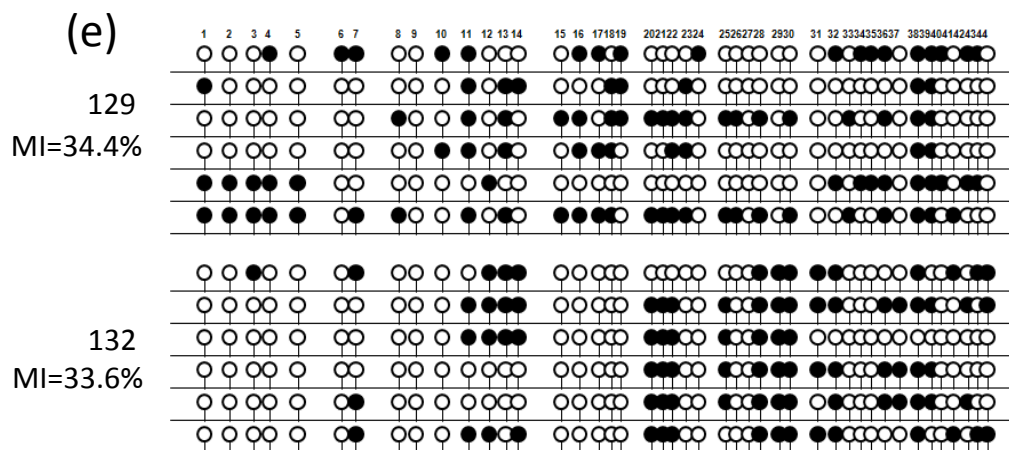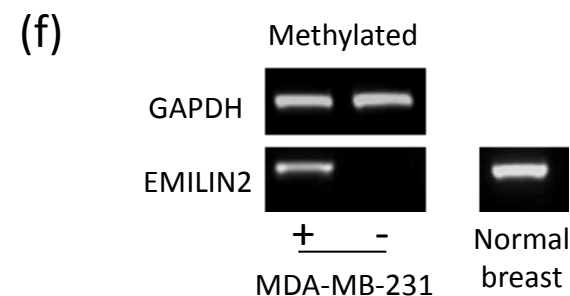

Supplement: MOESM8 [file 9554984]
